# Supplementary material for: Triple points and coexistence properties of the dense phases of water calculated using computer simulation
Source: Royal Society of Chemistry journal article supplement (doi:10.1039/b812832d), 2008-11-06
Supplement: b812832d.pdf [file b812832d.pdf]

Supplementary Material (ESI) for *Physical Chemistry Chemical Physics*  
This journal is © The Owner Societies 2008

Coexistence lines for the SPC/E model

Temperatures (T) are given in K,  
pressures (p) in bar,  
internal energies (U) in kcal/mol, and  
densities (rho) in g/cm<sup>3</sup>

| T         | p     | U_1    | U_2     | rho_1 | rho_2  |
|-----------|-------|--------|---------|-------|--------|
| Liquid-Ih |       |        |         |       |        |
| 209.8     | 500   | -12.51 | -13.286 | 1.042 | 0.9553 |
| 210.8     | 400   | -12.61 | -13.272 | 1.022 | 0.9546 |
| 212.8     | 200   | -12.57 | -13.244 | 1.031 | 0.9533 |
| 213.7     | 100   | -12.59 | -13.248 | 1.014 | 0.9519 |
| 214.6     | 1     | -12.53 | -13.225 | 1.010 | 0.9512 |
| 216.3     | -200  | -12.53 | -13.197 | 1.009 | 0.9493 |
| 226.4     | -2000 | -12.34 | -13.089 | 0.951 | 0.9284 |
| 215.6     | -5000 | -11.84 | -13.035 | 0.793 | 0.8987 |

Liquid-II

|       |       |         |         |       |        |
|-------|-------|---------|---------|-------|--------|
| 215.7 | 1     | -12.46  | -13.402 | 1.033 | 1.2121 |
| 226.7 | 1000  | -12.27  | -13.333 | 1.076 | 1.2163 |
| 234.8 | 2000  | -12.11  | -13.294 | 1.108 | 1.2212 |
| 241.1 | 3000  | -12.06  | -13.261 | 1.120 | 1.2266 |
| 245.9 | 4000  | -11.97  | -13.241 | 1.159 | 1.2324 |
| 249.8 | 5000  | -11.90  | -13.228 | 1.193 | 1.2394 |
| 254.9 | 7500  | -11.94  | -13.216 | 1.236 | 1.2551 |
| 256.4 | 10000 | -11.82  | -13.219 | 1.283 | 1.2708 |
| 253.8 | 13000 | -11.89  | -13.235 | 1.324 | 1.2895 |
| 247.7 | 16000 | -11.83  | -13.261 | 1.356 | 1.3081 |
| 239.7 | 19000 | -11.94  | -13.291 | 1.385 | 1.3258 |
| 228.3 | 22000 | -12.005 | -13.322 | 1.423 | 1.3426 |
| 213.6 | 25000 | -12.01  | -13.362 | 1.454 | 1.3597 |

Liquid-VI

|       |       |        |         |       |        |
|-------|-------|--------|---------|-------|--------|
| 225.0 | 20690 | -12.02 | -12.501 | 1.421 | 1.4538 |
| 234.2 | 25000 | -11.90 | -12.408 | 1.448 | 1.4714 |
| 242.3 | 31500 | -11.73 | -12.285 | 1.486 | 1.4972 |
| 245.3 | 37000 | -11.58 | -12.187 | 1.519 | 1.5175 |
| 242.5 | 43000 | -11.43 | -12.098 | 1.551 | 1.5397 |
| 235.5 | 49000 | -11.36 | -12.028 | 1.581 | 1.5606 |
| 224.4 | 55000 | -11.25 | -11.966 | 1.606 | 1.5815 |
| 211.4 | 61000 | -11.21 | -11.891 | 1.629 | 1.6011 |
| 193.9 | 67000 | -11.14 | -11.842 | 1.654 | 1.6204 |

Supplementary Material (ESI) for *Physical Chemistry Chemical Physics*  
This journal is © The Owner Societies 2008

Triple points and coexistence lines for the TIP4P/2005 model

Temperatures (T) are given in K,  
pressures (p) in bar,  
internal energies (U) in kcal/mol, and  
densities (rho) in g/cm<sup>3</sup>

\*\*\*\*\*

Triple points

Liquid-Ih-III triple point

| T     | p    | U(liq) | U(Ih)   | U(III)  | rho(liq) | rho(Ih) | rho(III) |
|-------|------|--------|---------|---------|----------|---------|----------|
| 213.1 | 3060 | -12.68 | -13.660 | -13.349 | 1.121    | 0.9515  | 1.1740   |

Liquid-III-V triple point

| T     | p    | U(liq) | U(III)  | U(V)    | rho(liq) | rho(III) | rho(V) |
|-------|------|--------|---------|---------|----------|----------|--------|
| 215.3 | 3690 | -12.65 | -13.336 | -13.249 | 1.152    | 1.1814   | 1.2625 |

Liquid-V-VI triple point

| T     | p    | U(liq) | U(V)    | U(VI)   | rho(liq) | rho(V) | rho(VI) |
|-------|------|--------|---------|---------|----------|--------|---------|
| 241.6 | 8060 | -12.24 | -13.086 | -12.980 | 1.239    | 1.2859 | 1.3575  |

Ih-II-III triple point

| T     | p    | U(Ih)   | U(II)   | U(III)  | rho(Ih) | rho(II) | rho(III) |
|-------|------|---------|---------|---------|---------|---------|----------|
| 195.9 | 3110 | -13.784 | -13.603 | -13.474 | 0.9535  | 1.1996  | 1.1793   |

II-III-V triple point

| T     | p    | U(II)   | U(III)  | U(V)    | rho(II) | rho(III) | rho(V) |
|-------|------|---------|---------|---------|---------|----------|--------|
| 200.0 | 3690 | -13.577 | -13.445 | -13.358 | 1.2024  | 1.1859   | 1.2670 |

\*\*\*\*\*

Coexistence lines

| T | p | U_1 | U_2 | rho_1 | rho_2 |
|---|---|-----|-----|-------|-------|
|---|---|-----|-----|-------|-------|

Liquid-Ih

|       |      |        |         |       |        |
|-------|------|--------|---------|-------|--------|
| 252.1 | 1    | -12.17 | -13.327 | 0.996 | 0.9208 |
| 248.0 | 500  | -12.36 | -13.368 | 0.996 | 0.9261 |
| 243.8 | 1000 | -12.29 | -13.416 | 1.039 | 0.9307 |
| 236.8 | 1600 | -12.35 | -13.477 | 1.074 | 0.9367 |
| 225.0 | 2400 | -12.51 | -13.569 | 1.116 | 0.9455 |
| 210.5 | 3200 | -12.66 | -13.679 | 1.133 | 0.9526 |

liquid-III

|       |      |        |         |       |        |
|-------|------|--------|---------|-------|--------|
| 212.8 | 3000 | -12.68 | -13.354 | 1.125 | 1.1732 |
| 214.7 | 3500 | -12.60 | -13.342 | 1.143 | 1.1786 |

liquid-V

Supplementary Material (ESI) for *Physical Chemistry Chemical Physics*  
This journal is © The Owner Societies 2008

|       |      |        |         |       |        |
|-------|------|--------|---------|-------|--------|
| 210.7 | 3200 | -12.67 | -13.279 | 1.141 | 1.2599 |
| 218.1 | 4000 | -12.61 | -13.233 | 1.168 | 1.2641 |
| 225.6 | 5000 | -12.47 | -13.187 | 1.187 | 1.2694 |
| 232.6 | 6000 | -12.35 | -13.137 | 1.203 | 1.2745 |
| 237.5 | 7000 | -12.31 | -13.112 | 1.219 | 1.2802 |
| 241.5 | 8000 | -12.31 | -13.086 | 1.235 | 1.2859 |

liquid-VI

|       |       |        |         |       |        |
|-------|-------|--------|---------|-------|--------|
| 245.0 | 8540  | -12.23 | -12.962 | 1.245 | 1.3590 |
| 254.4 | 10000 | -12.02 | -12.907 | 1.265 | 1.3651 |
| 265.1 | 12000 | -11.97 | -12.836 | 1.286 | 1.3728 |
| 278.3 | 15000 | -11.77 | -12.756 | 1.316 | 1.3853 |
| 293.7 | 20000 | -11.55 | -12.640 | 1.365 | 1.4064 |
| 303.4 | 25000 | -11.38 | -12.547 | 1.396 | 1.4271 |

Ih-II

|       |      |         |         |        |        |
|-------|------|---------|---------|--------|--------|
| 195.9 | 3107 | -13.786 | -13.606 | 0.9536 | 1.1996 |
| 180.0 | 3016 | -13.895 | -13.712 | 0.9550 | 1.2031 |
| 160.0 | 2902 | -14.035 | -13.847 | 0.9558 | 1.2080 |

Ih-III

|       |      |         |         |        |        |
|-------|------|---------|---------|--------|--------|
| 195.0 | 3000 | -13.610 | -13.475 | 1.1988 | 1.1791 |
| 200.0 | 3097 | -13.755 | -13.444 | 0.9530 | 1.1782 |
| 200.1 | 3700 | -13.578 | -13.438 | 1.2021 | 1.1857 |
| 213.1 | 3064 | -13.663 | -13.352 | 0.9512 | 1.1748 |

II-V

|       |      |         |         |        |        |
|-------|------|---------|---------|--------|--------|
| 200.0 | 3690 | -13.577 | -13.358 | 1.2024 | 1.2670 |
| 185.0 | 4270 | -13.681 | -13.471 | 1.2100 | 1.2755 |
| 170.0 | 4870 | -13.788 | -13.576 | 1.2179 | 1.2841 |
| 152.0 | 5580 | -13.910 | -13.700 | 1.2270 | 1.2939 |
| 134.0 | 6280 | -14.026 | -13.816 | 1.2353 | 1.3031 |
| 116.0 | 7000 | -14.134 | -13.925 | 1.2438 | 1.3117 |

III-V

|       |      |         |         |        |        |
|-------|------|---------|---------|--------|--------|
| 215.3 | 3690 | -13.335 | -13.249 | 1.1816 | 1.2621 |
| 200.0 | 3687 | -13.447 | -13.361 | 1.1857 | 1.2672 |

V-VI

|       |      |         |         |        |        |
|-------|------|---------|---------|--------|--------|
| 241.6 | 8060 | -13.086 | -12.980 | 1.2859 | 1.3575 |
| 215.0 | 7820 | -13.276 | -13.168 | 1.2920 | 1.3650 |
| 190.0 | 7620 | -13.449 | -13.339 | 1.2970 | 1.3717 |
| 165.0 | 7430 | -13.616 | -13.499 | 1.3026 | 1.3783 |
| 140.0 | 7270 | -13.776 | -13.657 | 1.3079 | 1.3847 |
| 115.0 | 7130 | -13.931 | -13.813 | 1.3130 | 1.3909 |

Supplementary Material (ESI) for *Physical Chemistry Chemical Physics*  
This journal is © The Owner Societies 2008

Triple points and coexistence lines for the TIP4P/Ice model

Temperatures (T) are given in K,  
pressures (p) in bar,  
internal energies (U) in kcal/mol, and  
densities (rho) in g/cm<sup>3</sup>

\*\*\*\*\*

Triple points

Liquid-Ih-III triple point

| T     | p    | U(Liq) | U(Ih)   | U(III)  | rho(liq) | rho(Ih) | rho(III) |
|-------|------|--------|---------|---------|----------|---------|----------|
| 231.8 | 2955 | -13.90 | -14.940 | -14.624 | 1.112    | 0.9335  | 1.1541   |

Liquid-III-V triple point

| T     | p    | U(Liq) | U(III)  | U(V)    | rho(liq) | rho(III) | rho(V) |
|-------|------|--------|---------|---------|----------|----------|--------|
| 232.6 | 3270 | -13.93 | -14.620 | -14.536 | 1.1205   | 1.1579   | 1.2387 |

Liquid-V-VI triple point

| T     | p    | U(Liq)  | U(V)    | U(VI)   | rho(liq) | rho(V) | rho(VI) |
|-------|------|---------|---------|---------|----------|--------|---------|
| 258.4 | 7630 | -13.525 | -14.385 | -14.275 | 1.211    | 1.2608 | 1.3323  |

Ih-II-III triple point

| T     | p    | U(Ih)   | U(II)   | U(III)  | rho(Ih) | rho(II) | rho(III) |
|-------|------|---------|---------|---------|---------|---------|----------|
| 219.4 | 2990 | -15.033 | -14.861 | -14.714 | 0.9348  | 1.1773  | 1.1577   |

II-III-V triple point

| T     | p    | U(II)   | U(III)  | U(V)    | rho(II) | rho(III) | rho(V) |
|-------|------|---------|---------|---------|---------|----------|--------|
| 221.6 | 3280 | -14.849 | -14.702 | -14.616 | 1.1786  | 1.1604   | 1.2422 |

\*\*\*\*\*

Coexistence lines

| T | p | U_1 | U_2 | rho_1 | rho_2 |
|---|---|-----|-----|-------|-------|
|---|---|-----|-----|-------|-------|

Liquid-Ih

|       |      |        |         |        |        |
|-------|------|--------|---------|--------|--------|
| 272.2 | 1    | -13.33 | -14.607 | 0.992  | 0.9061 |
| 267.4 | 500  | -13.33 | -14.651 | 1.024  | 0.9107 |
| 262.2 | 1000 | -13.47 | -14.703 | 1.025  | 0.9157 |
| 255.9 | 1500 | -13.61 | -14.755 | 1.063  | 0.9204 |
| 248.2 | 2000 | -13.69 | -14.823 | 1.075  | 0.9246 |
| 240.3 | 2500 | -13.75 | -14.883 | 1.098  | 0.9294 |
| 230.9 | 3000 | -13.85 | -14.945 | 1.1162 | 0.9345 |

Liquid-III

|       |      |         |         |       |        |
|-------|------|---------|---------|-------|--------|
| 231.9 | 3000 | -13.855 | -14.625 | 1.115 | 1.1539 |
| 232.9 | 3400 | -13.855 | -14.619 | 1.124 | 1.1593 |

Liquid-V

Supplementary Material (ESI) for *Physical Chemistry Chemical Physics*  
This journal is © The Owner Societies 2008

|       |      |        |         |       |        |
|-------|------|--------|---------|-------|--------|
| 235.1 | 3500 | -13.82 | -14.521 | 1.125 | 1.2397 |
| 239.5 | 4000 | -13.78 | -14.493 | 1.148 | 1.2426 |
| 245.9 | 5000 | -13.69 | -14.452 | 1.182 | 1.2471 |
| 253.5 | 6500 | -13.57 | -14.409 | 1.195 | 1.2550 |
| 259.6 | 8000 | -13.53 | -14.381 | 1.223 | 1.2631 |

Liquid-VI

|       |       |        |         |       |        |
|-------|-------|--------|---------|-------|--------|
| 265.6 | 8540  | -13.44 | -14.232 | 1.224 | 1.3349 |
| 297.2 | 14000 | -13.00 | -14.043 | 1.276 | 1.3549 |
| 321.0 | 21000 | -12.69 | -13.879 | 1.335 | 1.3819 |
| 337.0 | 30000 | -12.44 | -13.709 | 1.394 | 1.4157 |
| 340.5 | 40000 | -12.21 | -13.567 | 1.458 | 1.4510 |
| 334.9 | 50000 | -12.10 | -13.450 | 1.502 | 1.4838 |

Ih-II

|       |      |         |         |        |        |
|-------|------|---------|---------|--------|--------|
| 219.4 | 2990 | -15.039 | -14.859 | 0.9348 | 1.1774 |
| 210.0 | 2943 | -15.105 | -14.923 | 0.9351 | 1.1792 |
| 200.0 | 2893 | -15.173 | -14.994 | 0.9360 | 1.1815 |

Ih-III

|       |      |         |         |        |        |
|-------|------|---------|---------|--------|--------|
| 231.8 | 2955 | -14.938 | -14.612 | 0.9340 | 1.1530 |
| 220.0 | 2988 | -15.022 | -14.711 | 0.9356 | 1.1563 |

II-III

|       |      |         |         |        |        |
|-------|------|---------|---------|--------|--------|
| 219.5 | 3000 | -14.863 | -14.711 | 1.1773 | 1.1563 |
| 222.5 | 3400 | -14.846 | -14.693 | 1.1788 | 1.1616 |

II-V

|       |      |         |         |        |        |
|-------|------|---------|---------|--------|--------|
| 221.6 | 3280 | -14.852 | -14.617 | 1.1785 | 1.2430 |
| 210.0 | 3740 | -14.936 | -14.703 | 1.1841 | 1.2488 |
| 200.0 | 4130 | -15.005 | -14.778 | 1.1886 | 1.2543 |

III-V

|       |      |         |         |        |        |
|-------|------|---------|---------|--------|--------|
| 232.6 | 3270 | -14.620 | -14.538 | 1.1579 | 1.2391 |
| 222.0 | 3280 | -14.698 | -14.622 | 1.1607 | 1.2428 |

V-VI

|       |      |         |         |        |        |
|-------|------|---------|---------|--------|--------|
| 258.4 | 7631 | -14.389 | -14.273 | 1.2612 | 1.3321 |
| 240.0 | 7510 | -14.524 | -14.404 | 1.2645 | 1.3372 |
| 220.0 | 7420 | -14.657 | -14.544 | 1.2696 | 1.3426 |
| 200.0 | 7331 | -14.790 | -14.673 | 1.2732 | 1.3474 |

Supplementary Material (ESI) for *Physical Chemistry Chemical Physics*  
This journal is © The Owner Societies 2008

Coexistence lines for the TIP4P model

Temperatures (T) are given in K,  
pressures (p) in bar,  
internal energies (U) in kcal/mol, and  
densities (rho) in g/cm<sup>3</sup>

| T         | p    | U_1    | U_2     | rho_1 | rho_2  |
|-----------|------|--------|---------|-------|--------|
| Liquid-Ih |      |        |         |       |        |
| 232.4     | 1    | -10.90 | -12.023 | 1.012 | 0.9409 |
| 231.9     | 100  | -10.96 | -12.031 | 1.006 | 0.9416 |
| 230.4     | 300  | -10.91 | -12.052 | 1.028 | 0.9439 |
| 228.8     | 500  | -10.97 | -12.075 | 1.030 | 0.9458 |
| 219.9     | 1500 | -11.07 | -12.153 | 1.071 | 0.9572 |
| 207.7     | 2500 | -11.27 | -12.256 | 1.123 | 0.9678 |
| 199.2     | 3000 | -11.38 | -12.315 | 1.141 | 0.9737 |
| 193.4     | 3300 | -11.46 | -12.360 | 1.161 | 0.9771 |

|            |      |        |         |       |        |
|------------|------|--------|---------|-------|--------|
| Liquid-III |      |        |         |       |        |
| 196.6      | 5000 | -11.39 | -12.024 | 1.207 | 1.2233 |
| 196.2      | 4500 | -11.34 | -12.025 | 1.208 | 1.2168 |
| 195.9      | 4000 | -11.36 | -12.028 | 1.195 | 1.2112 |
| 195.0      | 3500 | -11.36 | -12.034 | 1.175 | 1.2046 |
| 193.4      | 3000 | -11.41 | -12.042 | 1.160 | 1.1978 |
| 191.6      | 2500 | -11.46 | -12.054 | 1.147 | 1.1899 |

|          |       |        |         |       |        |
|----------|-------|--------|---------|-------|--------|
| Liquid-V |       |        |         |       |        |
| 196.0    | 3820  | -11.37 | -11.936 | 1.192 | 1.2909 |
| 199.5    | 4300  | -11.36 | -11.915 | 1.202 | 1.2934 |
| 204.3    | 5000  | -11.32 | -11.885 | 1.216 | 1.2969 |
| 213.6    | 6500  | -11.18 | -11.828 | 1.235 | 1.3058 |
| 218.8    | 7660  | -11.04 | -11.794 | 1.276 | 1.3133 |
| 220.0    | 8000  | -11.01 | -11.788 | 1.274 | 1.3156 |
| 224.4    | 10000 | -10.95 | -11.754 | 1.295 | 1.3290 |
| 227.8    | 12000 | -10.93 | -11.722 | 1.318 | 1.3420 |
| 229.5    | 15000 | -10.93 | -11.691 | 1.360 | 1.3615 |
| 225.9    | 20000 | -10.87 | -11.646 | 1.415 | 1.3935 |
| 216.8    | 25000 | -10.85 | -11.634 | 1.456 | 1.4238 |

|           |       |        |         |       |        |
|-----------|-------|--------|---------|-------|--------|
| Liquid-VI |       |        |         |       |        |
| 201.4     | 6000  | -11.28 | -11.784 | 1.236 | 1.3819 |
| 210.3     | 7000  | -11.17 | -11.728 | 1.250 | 1.3855 |
| 225.0     | 8940  | -10.98 | -11.634 | 1.283 | 1.3928 |
| 251.7     | 14000 | -10.61 | -11.465 | 1.337 | 1.4147 |
| 272.6     | 21000 | -10.34 | -11.301 | 1.405 | 1.4468 |
| 284.6     | 30000 | -10.04 | -11.143 | 1.470 | 1.4864 |
| 287.4     | 40000 | -9.81  | -10.992 | 1.534 | 1.5266 |
| 280.6     | 50000 | -9.69  | -10.848 | 1.590 | 1.5643 |
| 264.1     | 60000 | -9.55  | -10.723 | 1.638 | 1.5992 |

|       |      |        |         |       |       |
|-------|------|--------|---------|-------|-------|
| Ih-II |      |        |         |       |       |
| 120.0 | 2910 | -12.87 | -12.654 | 0.981 | 1.243 |
| 150.0 | 3040 | -12.67 | -12.456 | 0.979 | 1.234 |
| 180.0 | 3170 | -12.46 | -12.248 | 0.977 | 1.226 |

Supplementary Material (ESI) for *Physical Chemistry Chemical Physics*  
This journal is © The Owner Societies 2008

II-III

|       |      |         |         |        |        |
|-------|------|---------|---------|--------|--------|
| 180.3 | 5000 | -12.261 | -12.141 | 1.2396 | 1.2275 |
| 177.9 | 4500 | -12.275 | -12.161 | 1.2366 | 1.2215 |
| 174.9 | 4000 | -12.295 | -12.180 | 1.2340 | 1.2167 |
| 171.3 | 3500 | -12.314 | -12.204 | 1.2310 | 1.2095 |
| 167.1 | 3000 | -12.339 | -12.237 | 1.2288 | 1.2058 |
| 162.1 | 2500 | -12.371 | -12.269 | 1.2265 | 1.1966 |

II-V

|       |      |         |         |        |        |
|-------|------|---------|---------|--------|--------|
| 75.0  | 8180 | -12.917 | -12.721 | 1.2875 | 1.3579 |
| 100.0 | 7170 | -12.772 | -12.578 | 1.2756 | 1.3447 |
| 125.0 | 6140 | -12.622 | -12.425 | 1.2627 | 1.3303 |
| 152.6 | 5000 | -12.441 | -12.245 | 1.2475 | 1.3139 |
| 165.0 | 4470 | -12.356 | -12.162 | 1.2400 | 1.3063 |
| 180.0 | 3848 | -12.252 | -12.051 | 1.2308 | 1.2962 |

II-VI

|       |      |         |         |        |        |
|-------|------|---------|---------|--------|--------|
| 150.0 | 6210 | -12.461 | -12.121 | 1.2564 | 1.4013 |
| 120.0 | 6890 | -12.651 | -12.312 | 1.2690 | 1.4155 |
| 90.0  | 7570 | -12.831 | -12.496 | 1.2803 | 1.4291 |
| 70.0  | 8010 | -12.947 | -12.613 | 1.2875 | 1.4378 |

III-V

|       |      |         |         |        |        |
|-------|------|---------|---------|--------|--------|
| 175.2 | 4046 | -12.177 | -12.085 | 1.2168 | 1.2994 |
| 200.0 | 4047 | -11.997 | -11.903 | 1.2079 | 1.2910 |

V-VI

|       |      |         |         |        |        |
|-------|------|---------|---------|--------|--------|
| 220.8 | 8390 | -11.784 | -11.656 | 1.3177 | 1.3905 |
| 190.0 | 8190 | -11.992 | -11.868 | 1.3252 | 1.4005 |
| 160.0 | 8030 | -12.197 | -12.070 | 1.3337 | 1.4100 |
| 125.0 | 7840 | -12.417 | -12.293 | 1.3424 | 1.4205 |
| 90.0  | 7670 | -12.636 | -12.507 | 1.3504 | 1.4307 |
